# Supplementary material for: DELAYED HEADING DATE3, Encoding a Heat Shock Transcription Factor, Delays Flowering Time and Improves Yield in Rice (Oryza sativa L.)
Source: MDPI journal article supplement (doi:10.3390/agriculture12071022), 2022-07-14
Supplement: s1 [file s1]

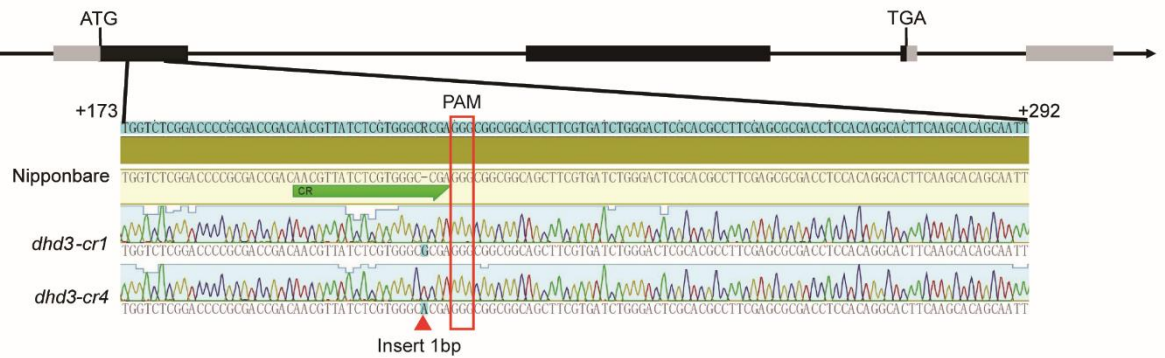

**Supplementary Figure S1.** Schematic diagram and Sanger sequencing of *DHD3*-knockout mutants. Two mutants inserted an A and G respectively, and causing a frameshift mutation respectively.

**Supplementary Table S1.** Primers used in the study

|                                                                              |                                                       |
|------------------------------------------------------------------------------|-------------------------------------------------------|
| Primers to amplify DHD5 CDS and clone onto pCAMBIA1390FLAG vector.           |                                                       |
| 1390-DHD3-F:                                                                 | 5'-TCTGCACTAGGTACCTGCAGATGGGCTCTAAGAAGCGGTCG-3'       |
| 1390-DHD3-R:                                                                 | 5'-ATGGATCCGTCGACCTGCAGAGCTTCGGTAATGACATCAGCATATTG-3' |
| Primers to amplify DHD5 CDS and clone onto pAN580 vector.                    |                                                       |
| pAN580-DHD3-F:                                                               | 5'-GCCCAGATCAACTAGTATGGGCTCTAAGAAGCGGTC-3'            |
| pAN580-DHD3-R:                                                               | 5'-TCGAGACGTCTCTAGAAGCTTCGGTAATGACATCAG-3'            |
| Primers to amplifying DHD5 CDS and clone onto pGBKT7 (BD) vector.            |                                                       |
| BD-DHD3-F:                                                                   | 5'-CATGGAGGCCGAATTCATGGGCTCTAAGAAGCGGTC-3'            |
| BD-DHD3-R:                                                                   | 5'-GCAGGTCGACGGATCCTCAAGCTTCGGTAATGACATCAG-3'         |
| Primers to construct CRISPR/CAS9 vector                                      |                                                       |
| DHD3-CR-F:                                                                   | 5'- <b>TGTGTG</b> AACGTTATCTCGTGGGCCGA-3'             |
| DHD3-CR-R:                                                                   | 5'- <b>AAAC</b> TCGGCCACGAGATAACGTT <b>CA</b> -3'     |
| Primers to amplify fragment include CRISPR target site for sequencing mutate |                                                       |

|                                                                                          |                                  |
|------------------------------------------------------------------------------------------|----------------------------------|
| DHD3-seq-F:                                                                              | 5'-AGAAGCGGTCGCCTCAGC-3'         |
| DHD3-seq-R:                                                                              | 5'-TGGCAGATAATCCCTAATACACG-3'    |
|                                                                                          |                                  |
| Primers to amplify HygR fragment on pCAMBIA1390FLAG vector to identify transgenic plants |                                  |
| Hyg-F:                                                                                   | 5'-CTTCTGCGGGCGATTTG-3'          |
| Hyg-R:                                                                                   | 5'-CCGTGGTTGGCTTGTATG-3'         |
|                                                                                          |                                  |
| Primers for RT- qPCR                                                                     |                                  |
| qDHD3-F:                                                                                 | 5'-CATACGCCAGCTCAACACCTATGG-3'   |
| qDHD3-R:                                                                                 | 5'-AACCTTCATTGGCCCACTCCCATC-3'   |
| UBQ-F                                                                                    | 5'-ACCACTTCGACCGCCACTACT-3'      |
| UBQ-R                                                                                    | 5'-ACGCCTAAGCCTGCTGGTT-3'        |
| qHd1-F                                                                                   | 5'-CGTTTCGCCAAGAGATCAG-3'        |
| qHd1-R                                                                                   | 5'-AGATAGAGCTGCAGTGGAGAAC-3'     |
| qEhd1-F                                                                                  | 5'-AACCCGGTCATCCTCCAT-3'         |
| qEhd1-R                                                                                  | 5'-TCATCTCTCACCTCATTTTCT-3'      |
| qHd3a-F                                                                                  | 5'-GCTAACGATGATCCCGAT-3'         |
| qHd3a-R                                                                                  | 5'-CCTGCAATGTATAGCATGC-3'        |
| qMADS14-F                                                                                | 5'-CAACCTCAAACAAGTTCCTC-3'       |
| qMADS14-R                                                                                | 5'-TGCTGCTACATCCTCTATCC-3'       |
| qCOL4-F                                                                                  | 5'-GTCCATGGACGGAATCAAGG-3'       |
| qCOL4-R                                                                                  | 5'-CTCCGACGACGACAAGCTGT-3'       |
| qRFT1-F                                                                                  | 5'-TGACCTAGATTCAAAGTCTAATCCTT-3' |
| qRFT1-R                                                                                  | 5'-TGCCGGCCATGTCAAATTAATAAC-3'   |
